# Supplementary material
Source: PubMed Central journal article supplement (PMC6870948)
Supplement: HBM-31-1713-s002.pdf [file HBM-31-1713-s002.pdf]

**Supplemental Table 1: Executive control network identified by spatial ICA**

| Region                   | Females |     |     |     |     |         |          | Males |     |     |     |     |         |          |
|--------------------------|---------|-----|-----|-----|-----|---------|----------|-------|-----|-----|-----|-----|---------|----------|
|                          | BA      | R/L | X   | Y   | Z   | t-score | p-value  | BA    | R/L | X   | Y   | Z   | t-score | p-value  |
| <b>Frontal</b>           |         |     |     |     |     |         |          |       |     |     |     |     |         |          |
| Superior frontal gyrus   | 8       | R+L | 0   | 29  | 49  | 4.47    | 2.34E-04 | 8     | R>L | 6   | 17  | 49  | 4.92    | 1.11E-04 |
| Middle frontal gyrus     | 6       | R   | 31  | 14  | 51  | 3.79    | 1.31E-03 | 6     | R   | 24  | 9   | 59  | 6.61    | 3.00E-05 |
|                          |         | L   | -22 | -1  | 55  | 3.80    | 1.30E-03 |       |     |     |     |     |         |          |
|                          | 9       | R   | 39  | 29  | 31  | 8.56    | 4.04E-08 | 9,46  | R   | 41  | 42  | 28  | 8.04    | 2.28E-07 |
|                          |         | L   | -42 | 26  | 31  | 5.36    | 3.00E-05 | 9,46  | L   | -42 | 30  | 32  | 5.71    | 2.10E-05 |
|                          | 10      | R   | 29  | 48  | 2   | 4.02    | 6.79E-04 | 10    | R   | 25  | 62  | 10  | 3.52    | 2.47E-03 |
|                          |         | L   | -41 | 41  | 1   | 3.69    | 1.46E-03 |       | L   | -38 | 54  | 10  | 3.55    | 2.29E-03 |
| Inferior frontal gyrus   | 46      | R   | 45  | 39  | 7   | 6.33    | 3.00E-05 | 44,45 | R   | 51  | 14  | 18  | 5.15    | 6.70E-05 |
|                          |         | L   | -47 | 41  | 13  | 3.17    | 4.80E-03 |       |     |     |     |     |         |          |
| <b>Parietal</b>          |         |     |     |     |     |         |          |       |     |     |     |     |         |          |
| Inferior parietal        | 40      | R   | 39  | -45 | 45  | 6.35    | 3.00E-06 | 39,40 | R   | 54  | -37 | 43  | 8.09    | 2.08E-07 |
|                          |         | L   | -49 | -51 | 46  | 6.28    | 4.00E-06 |       | L   | -36 | -58 | 37  | 6.09    | 9.00E-06 |
| Precuneus                | 7,19    | R   | 26  | -74 | 35  | 3.37    | 3.09E-03 | 7,19  | R   | 8   | -70 | 31  | 4.23    | 5.03E-04 |
|                          |         | L   | -23 | -76 | 42  | 3.82    | 1.06E-03 |       | L   | -12 | -73 | 31  | 3.13    | 5.76E-03 |
| <b>Temporal</b>          |         |     |     |     |     |         |          |       |     |     |     |     |         |          |
| Middle temporal gyrus    | 21      | R   | 57  | -49 | -2  | 5.38    | 2.90E-05 |       |     |     |     |     |         |          |
| Inferior temporal gyrus  | 37      | L   | -44 | -52 | -13 | 4.16    | 4.82E-04 | 20    | R   | 57  | -37 | -8  | 4.22    | 5.12E-04 |
| <b>Limbic/paralimbic</b> |         |     |     |     |     |         |          |       |     |     |     |     |         |          |
| PCC                      |         |     |     |     |     |         |          | 23    | R+L | -3  | -34 | 25  | 3.72    | 1.55E-03 |
| AI                       |         |     |     |     |     |         |          | 13    | R   | 31  | 20  | 8   | 3.92    | 1.00E-03 |
| <b>Subcortical</b>       |         |     |     |     |     |         |          |       |     |     |     |     |         |          |
| Medial dorsal nucleus    |         |     |     |     |     |         |          |       | R   | 6   | -16 | 12  | 3.67    | 1.75E-03 |
| <b>Cerebellum</b>        |         |     |     |     |     |         |          |       |     |     |     |     |         |          |
| Posterior lobe           |         | R   | 7   | -73 | -26 | 2.78    | 1.17E-02 |       | R   | 9   | -72 | -26 | 3.11    | 6.04E-03 |
|                          |         | L   | -12 | -73 | -26 | 4.47    | 2.31E-04 |       | L   | -7  | -70 | -26 | 3.36    | 5.23E-03 |
| Anterior lobe            |         |     |     |     |     |         |          |       | L   | -29 | -58 | -26 | 3.97    | 9.05E-04 |

Coordinates are in Talaraich space. PCC, posterior cingulate cortex; AI, anterior insula
