# Supplementary material
Source: PubMed Central journal article supplement (PMC6870948)
Supplement: HBM-31-1713-s005.pdf [file HBM-31-1713-s005.pdf]

**Supplemental Table 2: Salience network identified by spatial ICA**

| Region                          | Females        |     |     |     |    |         |          | Males             |     |     |     |     |         |          |
|---------------------------------|----------------|-----|-----|-----|----|---------|----------|-------------------|-----|-----|-----|-----|---------|----------|
|                                 | BA             | R/L | X   | Y   | Z  | t-score | p-value  | BA                | R/L | X   | Y   | Z   | t-score | p-value  |
| <b>Frontal</b>                  |                |     |     |     |    |         |          |                   |     |     |     |     |         |          |
| Middle & Inferior frontal gyrus | <b>6</b>       | R   | 39  | 5   | 40 | 3.35    | 3.79E-03 | <b>6</b>          | R   | 48  | -7  | 40  | 5.91    | 2.90E-05 |
|                                 |                | L   | -39 | -11 | 45 | 3.17    | 5.63E-03 |                   | L   | -27 | -7  | 58  | 4.26    | 6.79E-04 |
|                                 | <b>9,46,10</b> | R   | 42  | 36  | 25 | 10.94   | 4.08E-09 | <b>9,46,10</b>    | R   | 39  | 37  | 26  | 7.59    | 2.00E-06 |
|                                 |                | L   | -33 | 32  | 37 | 6.46    | 6.00E-06 | <b>9</b>          | L   | -42 | 23  | 31  | 4.30    | 6.32E-04 |
|                                 | <b>10</b>      | R   | 24  | 53  | -2 | 3.99    | 9.54E-04 | <b>10</b>         | R   | 25  | 54  | 8   | 5.28    | 9.20E-05 |
|                                 |                |     |     |     |    |         |          |                   | L   | -21 | 50  | 7   | 5.24    | 1.00E-04 |
| <b>Parietal</b>                 |                |     |     |     |    |         |          |                   |     |     |     |     |         |          |
| Inferior parietal               | <b>40</b>      | R   | 54  | -46 | 25 | 5.36    | 5.20E-05 | <b>40</b>         | R   | 57  | -37 | 34  | 5.03    | 1.49E-04 |
|                                 |                | L   | -54 | -40 | 40 | 7.59    | 7.44E-07 |                   | L   | -39 | -31 | 52  | 5.38    | 7.70E-05 |
| Precuneus                       | <b>7</b>       | R   | 9   | -67 | 31 | 5.13    | 8.40E-05 |                   |     |     |     |     |         |          |
| <b>Occipital</b>                |                |     |     |     |    |         |          |                   |     |     |     |     |         |          |
| Cuneus                          | <b>18</b>      | R   | 9   | -91 | 16 | 3.69    | 1.84E-03 |                   |     |     |     |     |         |          |
| <b>Limbic/paralimbic</b>        |                |     |     |     |    |         |          |                   |     |     |     |     |         |          |
| aMCC+pgACC                      | <b>24,32</b>   | R+L | 3   | 29  | 28 | 7.19    | 2.00E-06 | <b>Border32/8</b> | R+L | -6  | 29  | 34  | 7.60    | 2.00E-06 |
|                                 |                | R   |     |     |    |         |          | <b>32 (pgACC)</b> | R   | 9   | 38  | 7   | 4.13    | 8.87E-04 |
| AI/Frontoinsula                 | <b>13</b>      | R   | 34  | 12  | 1  | 7.78    | 5.30E-07 | <b>13</b>         | R   | 39  | 16  | 3   | 4.38    | 5.39E-04 |
|                                 |                | L   | -33 | 11  | 13 | 4.10    | 7.45E-04 |                   |     |     |     |     |         |          |
| <b>Cerebellum</b>               |                |     |     |     |    |         |          |                   |     |     |     |     |         |          |
| Posterior lobe                  |                |     |     |     |    |         |          |                   | L   | -30 | -61 | -23 | 5.17    | 1.15E-04 |

Coordinates are in Talaraich space. aMCC, anterior middle cingulate; pgACC, pregenual anterior cingulate cortex; AI, anterior insula; FI, frontoinsula
