# Supplementary material
Source: PubMed Central journal article supplement (PMC6870948)
Supplement: HBM-31-1713-s006.pdf [file HBM-31-1713-s006.pdf]

**Supplemental Table 4: Networks active during cognitive processes identified by sog-ICA**

| Region                   | Females |     |     |     |     |         |          | Males    |          |     |     |      |          |          |
|--------------------------|---------|-----|-----|-----|-----|---------|----------|----------|----------|-----|-----|------|----------|----------|
|                          | BA      | R/L | X   | Y   | Z   | t-score | p-value  | BA       | R/L      | X   | Y   | Z    | t-score  | p-value  |
| <b>Frontal</b>           |         |     |     |     |     |         |          |          |          |     |     |      |          |          |
| Superior frontal gyrus   | 8       | R   | 44  | 12  | 39  | 9.16    | 2.09E-08 | 8        | R        | 27  | 24  | 51   | 7.08     | 9.76E-07 |
|                          |         | L   | -38 | 28  | 40  | 4.7     | 1.55E-04 |          |          |     |     |      |          |          |
| Middle frontal gyrus     | 6       | R   | 44  | 7   | 41  | 7.41    | 5.04E-07 | 6        | R        | 25  | 5   | 53   | 8.63     | 5.27E-08 |
|                          |         | L   |     |     |     |         |          |          | L        | -28 | 4   | 54   | 4.61     | 1.90E-04 |
|                          | 9,46    | R   | 44  | 28  | 31  | 8.65    | 5.15E-08 | 9        | R        | 43  | 27  | 31   | 7.49     | 4.33E-07 |
|                          |         | L   | -38 | 38  | 26  | 4.02    | 7.00E-04 |          | L        | -42 | 29  | 31   | 3.43     | 2.80E-03 |
|                          | 10      | R   | 39  | 49  | 13  | 8.14    | 1.28E-07 | 10       | R        | 38  | 48  | 6    | 8.15     | 1.36E-07 |
|                          |         | L   | -33 | 47  | -2  | 2.89    | 9.27E-03 |          | L        | -33 | 53  | 4    | 5.51     | 2.60E-05 |
| Inferior frontal gyrus   | 44      | R   | 55  | 10  | 16  | 3.43    | 2.78E-02 | 44       | R        | 52  | 12  | 11   | 4.47     | 2.63E-04 |
|                          |         | 47  | R   | 46  | 34  | -2      | 4.5      |          | 2.41E-04 |     |     |      |          |          |
| <b>Parietal</b>          |         |     |     |     |     |         |          |          |          |     |     |      |          |          |
| Inferior parietal        | 40, 39  | R   | 42  | -52 | 43  | 10.98   | 1.14E-09 | 40,39    | R        | 49  | -37 | 42   | 9.36     | 1.50E-08 |
|                          |         | L   | -48 | -49 | 46  | 5.9     | 1.10E-05 |          | L        | -42 | -58 | 40   | 5.69     | 1.70E-05 |
| Precuneus                | 7       | R   | 9   | -73 | 40  | 3.38    | 3.11E-03 | 7        | R        | 10  | -77 | 48   | 4.25     | 0.00043  |
| <b>Temporal</b>          |         |     |     |     |     |         |          |          |          |     |     |      |          |          |
| Superior temporal        | 22      | R   | 58  | -52 | 12  | 3.92    | 9.15E-04 |          |          |     |     |      |          |          |
| Middle temporal          | 21,37   | R   | 58  | -20 | -3  | 4.52    | 2.30E-04 | 20,21,37 | R        | 60  | -37 | -5   | 6.27     | 5.00E-06 |
|                          |         |     |     |     |     |         |          | 20       | L        | -57 | -45 | -9   | 3.19     | 4.82E-03 |
| <b>Limbic/paralimbic</b> |         |     |     |     |     |         |          |          |          |     |     |      |          |          |
| PCC                      | 31      | R+L | 3   | -37 | 40  | 5.55    | 2.30E-05 | 31       | R+L      | 3   | -34 | 37   | 5.79     | 1.40E-05 |
| Border aMCC & 9          | 32/9    | R   | 8   | 38  | 22  | 5.22    | 4.80E-05 | 32/9     | R        | 7   | 39  | 28   | 3.07     | 3.51E-03 |
| FI                       | 13      | R   | 36  | 17  | 2   | 5.71    | 1.60E-05 | 13       | R        | 33  | 20  | 4    | 3.39     | 3.06E-03 |
| <b>Subcortical</b>       |         |     |     |     |     |         |          |          |          |     |     |      |          |          |
| Caudate body             |         | R   | 12  | 2   | 16  | 5.55    | 2.00E-05 |          | R        | 12  | 11  | 16   | 2.68     | 1.49E-02 |
| Medial dorsal nucleus    |         |     |     |     |     |         |          |          | R        | 6   | -16 | 7    | 3.73     | 1.41E-03 |
| <b>Cerebellum</b>        |         |     |     |     |     |         |          |          |          |     |     |      |          |          |
| Posterior lobe           |         |     |     |     |     |         |          |          | R        | 9   | -70 | -26  | 2.76     | 1.24E-02 |
|                          |         | L   | -30 | -63 | -25 | 4.753   | 1.38E-04 | L        | -15      | -79 | -20 | 3.79 | 1.25E-03 |          |
| Anterior lobe            |         |     |     |     |     |         |          | L        | -30      | -61 | -26 | 3.13 | 5.48E-03 |          |

Coordinates are in Talaraich space. PCC, posterior cingulate; pMCC, posterior middle cingulate cortex; aMCC, anterior middle cingulate cortex; FI, frontoinsula
